# Supplementary material for: Derangement in Nicotinamide Adenine Dinucleotide Metabolism is Observed During Acute Kidney Injury Among Male Agricultural Workers at Risk for Mesoamerican Nephropathy
Source: PubMed Central journal article supplement — Kidney Int Rep. 2024 Apr 18;9(7):2250–9. doi: 10.1016/j.ekir.2024.04.027 (PMC11284402; doi:10.1016/j.ekir.2024.04.027), 2024-04-18
Supplement: mmc1.pdf [file mmc1.pdf]

## **SUPPLEMENTARY MATERIAL**

**for**

### **Derangement in nicotinamide adenine dinucleotide (NAD<sup>+</sup>) metabolism is observed during acute kidney injury among male agricultural workers at risk for Mesoamerican Nephropathy**

Running Headline: AKI and NAD<sup>+</sup> metabolism in workers at risk for MeN

Nathan H Raines MD, MPH<sup>1,2†</sup>

Dominic A Leone MS, MPH<sup>3</sup>

Juan Jose Amador MD, MPH<sup>3</sup>

Damaris Lopez-Pilarte ER, MPH<sup>3</sup>

Oriana Ramírez-Rubio MD, PhD, MPH<sup>3,4</sup>

Iris S Delgado MPH<sup>3</sup>

Lauren J Francey MS<sup>1</sup>

Jessica H Leibler DrPH, ScM<sup>5</sup>

John M Asara PhD<sup>2,6</sup>

Madeleine K Scammell DSc<sup>3</sup>

Samir M Parikh MD<sup>7</sup>

\*Daniel R Brooks DSc<sup>3†</sup>

\*David J Friedman MD<sup>1,2†</sup>

<sup>1</sup>Division of Nephrology, Department of Medicine, Beth Israel Deaconess Medical Center, Boston, MA 02215, USA

<sup>2</sup>Harvard Medical School, Boston, MA 02215, USA

<sup>3</sup>Department of Epidemiology, Boston University School of Public Health, Boston, MA 02118, USA

<sup>4</sup>ISGlobal, Barcelona Institute for Global Health, 08003 Barcelona, Spain

<sup>5</sup>Department of Environmental Health, Boston University School of Public Health, Boston, MA 02118, USA

<sup>6</sup>Division of Signal Transduction, Beth Israel Deaconess Medical Center

<sup>7</sup>Division of Nephrology, Department of Medicine, University of Texas Southwestern Medical School, Dallas, TX  
75390, USA

\*These authors contributed equally to this work (co-senior authors)

†Author to whom correspondence should be addressed

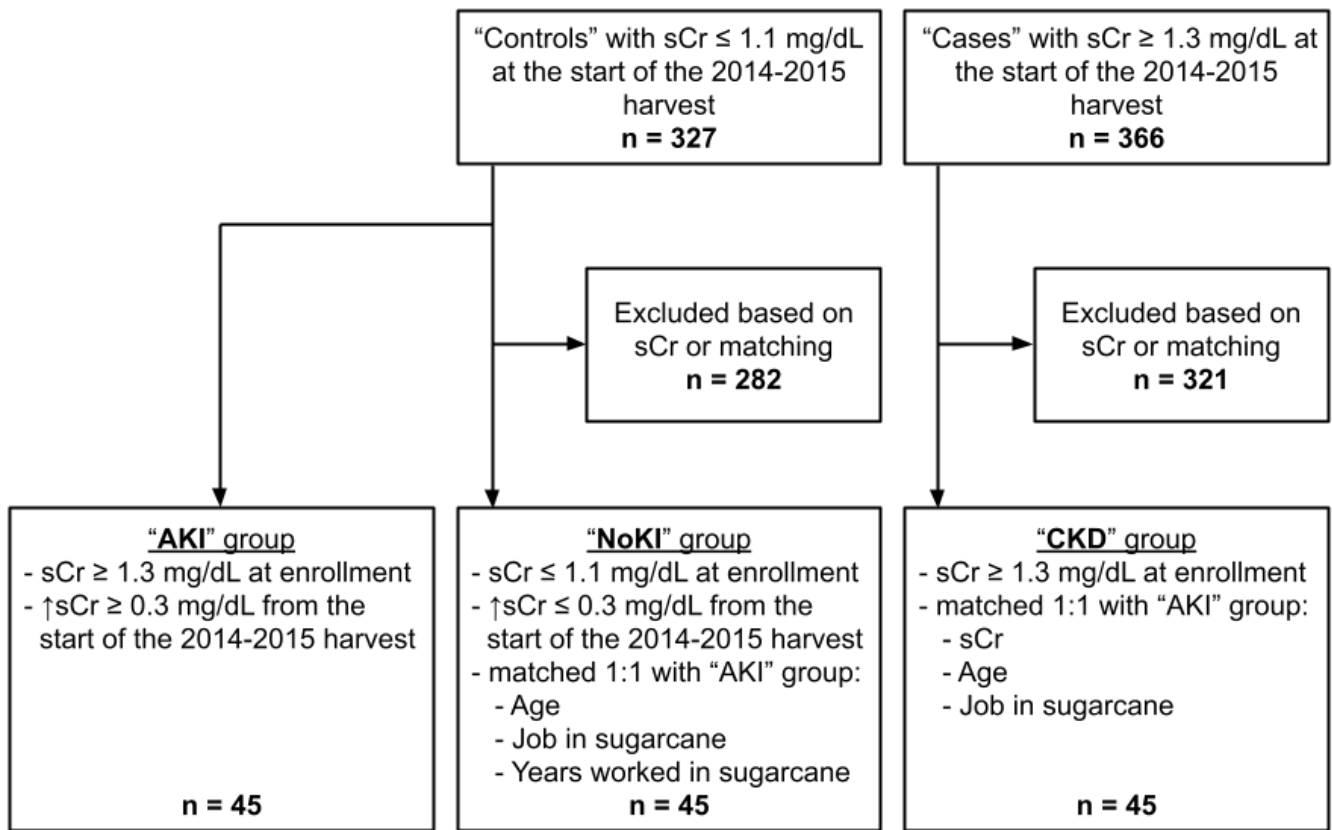

**Supplementary Figure S1. Study Flow Diagram.** sCr, serum creatinine; AKI, acute kidney injury; NoKI, no kidney injury; CKD, chronic kidney disease

**Supplementary Table S1. Levels of metabolites in nicotinamide adenine dinucleotide (NAD<sup>+</sup>)**

**biosynthetic pathways among kidney injury groups.** Data shown are values for each of the acute kidney injury (AKI), no kidney injury (NoKI), and chronic kidney disease (CKD) groups. P values describe the comparison between the AKI and each of the NoKI and CKD groups. “Imputed” indicates the number of individuals in each group with values below the threshold of detection for each metabolite.

| <b>Metabolite</b>                             | <b>AKI (n = 45)</b>    | <b>NoKI (n = 45)</b>    | <b>p</b> | <b>CKD (n = 45)</b>     | <b>p</b> |
|-----------------------------------------------|------------------------|-------------------------|----------|-------------------------|----------|
| NAD <sup>+</sup> (positive) AUC, median (IQR) | 571 (304 to 1502)      | 336 (242 to 538)        | 0.03     | 317 (236 to 452)        | < 0.0001 |
| Imputed, n (%)                                | 0 (0)                  | 1 (2)                   |          | 3 (7)                   |          |
| NAD <sup>+</sup> (negative) AUC, median (IQR) | 56 (15 to 117)         | 36 (3 to 62)            | 0.29     | 50 (3 to 123)           | 0.81     |
| Imputed, n (%)                                | 11 (24)                | 15 (33)                 |          | 14 (31)                 |          |
| Tryptophan AUC, median (IQR)                  | 55262 (33576 to 91745) | 93032 (70932 to 123040) | 0.0002   | 63847 (48386 to 127222) | 0.036    |
| Imputed, n (%)                                | 0 (0)                  | 0 (0)                   |          | 0 (0)                   |          |
| Kynurenine AUC, median (IQR)                  | 12490 (7373 to 21329)  | 12642 (7591 to 20004)   | 0.85     | 16425 (10968 to 30981)  | 0.02     |
| Imputed, n (%)                                | 0 (0)                  | 1 (2)                   |          | 0 (0)                   |          |
| Kynurenic acid AUC, median (IQR)              | 2266 (1614 to 3529)    | 2842 (2087 to 4804)     | 0.06     | 2979 (2284 to 4967)     | 0.02     |
| Imputed, n (%)                                | 0 (0)                  | 0 (0)                   |          | 0 (0)                   |          |
| Quinolate AUC, median (IQR)                   | 5731 (3727 to 8741)    | 5278 (3628 to 8683)     | 0.91     | 7304 (4608 to 8817)     | 0.41     |
| Imputed, n (%)                                | 0 (0)                  | 0 (0)                   |          | 0 (0)                   |          |
| Nicotinamide AUC, median (IQR)                | 48604 (42138 to 60600) | 66792 (55421 to 106089) | 0.0002   | 89115 (58702 to 122155) | < 0.0001 |
| Imputed, n (%)                                | 0 (0)                  | 0 (0)                   |          | 0 (0)                   |          |
| Methylnicotinamide AUC, median (IQR)          | 12815 (9550 to 34595)  | 35104 (17970 to 77074)  | 0.02     | 33199 (17933 to 67019)  | 0.02     |
| Imputed, n (%)                                | 0 (0)                  | 0 (0)                   |          | 0 (0)                   |          |
| Nicotinamide riboside                         | 5157 (3004 to          | 5301 (3521 to           | 0.54     | 7289 (5335 to           | 0.09     |

|                                  |                  |                 |      |                 |      |
|----------------------------------|------------------|-----------------|------|-----------------|------|
| AUC, median (IQR)                | 10547)           | 9922)           |      | 11524)          |      |
| Imputed, n (%)                   | 0 (0)            | 0 (0)           |      | 0 (0)           |      |
| Nicotinic acid AUC, median (IQR) | 167 (112 to 299) | 129 (85 to 238) | 0.81 | 132 (68 to 218) | 0.13 |
| Imputed, n (%)                   | 1 (2)            | 3 (7)           |      | 3 (7)           |      |

**Supplementary Table S2: Supplementary Data File Dictionary.** LC-MS/MS, liquid chromatography-coupled tandem mass spectrometry.

| <b>Variable</b>       | <b>Description</b>                                                                                               |
|-----------------------|------------------------------------------------------------------------------------------------------------------|
| PairID                | Participant Identification                                                                                       |
| MatchGroup            | Pairing group                                                                                                    |
| KidneyGroup           | Kidney disease category. AKI = acute kidney injury, NoAKI = no acute kidney injury, CKD = chronic kidney disease |
| sCr                   | Serum creatinine, in mg/dL                                                                                       |
| uCr                   | Urine creatinine, in mg/dL                                                                                       |
| Q/T                   | Urine quinolate to tryptophan ratio, with each measured in LC-MS/MS peak area under curve                        |
| KynA/T                | Urine kynurenic acid to tryptophan ratio, with each measured in LC-MS/MS peak area under curve                   |
| kynurenic acid        | Urine LC-MS/MS peak area under curve, corrected for urine creatinine                                             |
| kynureinine           | Urine LC-MS/MS peak area under curve, corrected for urine creatinine                                             |
| methylnicotinamide    | Urine LC-MS/MS peak area under curve, corrected for urine creatinine                                             |
| NAD+_nega             | Urine LC-MS/MS peak area under curve, corrected for urine creatinine                                             |
| NAD+_posi             | Urine LC-MS/MS peak area under curve, corrected for urine creatinine                                             |
| nicotinamide          | Urine LC-MS/MS peak area under curve, corrected for urine creatinine                                             |
| nicotinamide riboside | Urine LC-MS/MS peak area under curve, corrected for urine creatinine                                             |
| nicotinate            | Urine LC-MS/MS peak area under curve, corrected for urine creatinine                                             |
| quinolate             | Urine LC-MS/MS peak area under curve, corrected for urine creatinine                                             |
| tryptophan            | Urine LC-MS/MS peak area under curve, corrected for urine creatinine                                             |

## STROBE Statement—checklist of items that should be included in reports of observational studies

|                              | Item No | Recommendation                                                                                                                                                                                                                                                                                                                                                                                                                                                         | Page No      |
|------------------------------|---------|------------------------------------------------------------------------------------------------------------------------------------------------------------------------------------------------------------------------------------------------------------------------------------------------------------------------------------------------------------------------------------------------------------------------------------------------------------------------|--------------|
| Title and abstract           | 1       | (a) Indicate the study's design with a commonly used term in the title or the abstract                                                                                                                                                                                                                                                                                                                                                                                 | 1            |
|                              |         | (b) Provide in the abstract an informative and balanced summary of what was done and what was found                                                                                                                                                                                                                                                                                                                                                                    | 3            |
| <b>Introduction</b>          |         |                                                                                                                                                                                                                                                                                                                                                                                                                                                                        |              |
| Background/rationale         | 2       | Explain the scientific background and rationale for the investigation being reported                                                                                                                                                                                                                                                                                                                                                                                   | 5            |
| Objectives                   | 3       | State specific objectives, including any prespecified hypotheses                                                                                                                                                                                                                                                                                                                                                                                                       | 6,<br>Tab. 1 |
| <b>Methods</b>               |         |                                                                                                                                                                                                                                                                                                                                                                                                                                                                        |              |
| Study design                 | 4       | Present key elements of study design early in the paper                                                                                                                                                                                                                                                                                                                                                                                                                | 7            |
| Setting                      | 5       | Describe the setting, locations, and relevant dates, including periods of recruitment, exposure, follow-up, and data collection                                                                                                                                                                                                                                                                                                                                        | 7-8          |
| Participants                 | 6       | (a) <i>Cohort study</i> —Give the eligibility criteria, and the sources and methods of selection of participants. Describe methods of follow-up<br><i>Case-control study</i> —Give the eligibility criteria, and the sources and methods of case ascertainment and control selection. Give the rationale for the choice of cases and controls<br><i>Cross-sectional study</i> —Give the eligibility criteria, and the sources and methods of selection of participants | 7            |
|                              |         | (b) <i>Cohort study</i> —For matched studies, give matching criteria and number of exposed and unexposed<br><i>Case-control study</i> —For matched studies, give matching criteria and the number of controls per case                                                                                                                                                                                                                                                 | 7            |
| Variables                    | 7       | Clearly define all outcomes, exposures, predictors, potential confounders, and effect modifiers. Give diagnostic criteria, if applicable                                                                                                                                                                                                                                                                                                                               | 7-8          |
| Data sources/<br>measurement | 8*      | For each variable of interest, give sources of data and details of methods of assessment (measurement). Describe comparability of assessment methods if there is more than one group                                                                                                                                                                                                                                                                                   | 8-9          |
| Bias                         | 9       | Describe any efforts to address potential sources of bias                                                                                                                                                                                                                                                                                                                                                                                                              | 7,9          |
| Study size                   | 10      | Explain how the study size was arrived at                                                                                                                                                                                                                                                                                                                                                                                                                              | 7            |
| Quantitative variables       | 11      | Explain how quantitative variables were handled in the analyses. If applicable, describe which groupings were chosen and why                                                                                                                                                                                                                                                                                                                                           | 9-10         |
| Statistical methods          | 12      | (a) Describe all statistical methods, including those used to control for confounding                                                                                                                                                                                                                                                                                                                                                                                  | 9-10         |
|                              |         | (b) Describe any methods used to examine subgroups and interactions                                                                                                                                                                                                                                                                                                                                                                                                    | n/a          |
|                              |         | (c) Explain how missing data were addressed                                                                                                                                                                                                                                                                                                                                                                                                                            | 9            |

|                                                                                                              |       |
|--------------------------------------------------------------------------------------------------------------|-------|
| (d) <i>Cohort study</i> —If applicable, explain how loss to follow-up was addressed                          | 7, 10 |
| <i>Case-control study</i> —If applicable, explain how matching of cases and controls was addressed           |       |
| <i>Cross-sectional study</i> —If applicable, describe analytical methods taking account of sampling strategy |       |
| (e) Describe any sensitivity analyses                                                                        |       |

## Results

|                  |     |                                                                                                                                                                                                              |                       |
|------------------|-----|--------------------------------------------------------------------------------------------------------------------------------------------------------------------------------------------------------------|-----------------------|
| Participants     | 13* | (a) Report numbers of individuals at each stage of study—eg numbers potentially eligible, examined for eligibility, confirmed eligible, included in the study, completing follow-up, and analysed            | Fig. S1               |
|                  |     | (b) Give reasons for non-participation at each stage                                                                                                                                                         | Fig. S1               |
|                  |     | (c) Consider use of a flow diagram                                                                                                                                                                           | Fig. S1               |
| Descriptive data | 14* | (a) Give characteristics of study participants (eg demographic, clinical, social) and information on exposures and potential confounders                                                                     | 10, Tab. 2            |
|                  |     | (b) Indicate number of participants with missing data for each variable of interest                                                                                                                          | Tab. S1               |
|                  |     | (c) <i>Cohort study</i> —Summarise follow-up time (eg, average and total amount)                                                                                                                             | n/a                   |
| Outcome data     | 15* | <i>Cohort study</i> —Report numbers of outcome events or summary measures over time                                                                                                                          | n/a                   |
|                  |     | <i>Case-control study</i> —Report numbers in each exposure category, or summary measures of exposure                                                                                                         | 7, Tab. 2             |
|                  |     | <i>Cross-sectional study</i> —Report numbers of outcome events or summary measures                                                                                                                           | n/a                   |
| Main results     | 16  | (a) Give unadjusted estimates and, if applicable, confounder-adjusted estimates and their precision (eg, 95% confidence interval). Make clear which confounders were adjusted for and why they were included | 11, Fig 1.            |
|                  |     | (b) Report category boundaries when continuous variables were categorized                                                                                                                                    | n/a                   |
|                  |     | (c) If relevant, consider translating estimates of relative risk into absolute risk for a meaningful time period                                                                                             | n/a                   |
| Other analyses   | 17  | Report other analyses done—eg analyses of subgroups and interactions, and sensitivity analyses                                                                                                               | 11, Fig. 1-3, Tab. S1 |

## Discussion

|                |    |                                                                                                                                                                            |       |
|----------------|----|----------------------------------------------------------------------------------------------------------------------------------------------------------------------------|-------|
| Key results    | 18 | Summarise key results with reference to study objectives                                                                                                                   | 12-13 |
| Limitations    | 19 | Discuss limitations of the study, taking into account sources of potential bias or imprecision. Discuss both direction and magnitude of any potential bias                 | 13-14 |
| Interpretation | 20 | Give a cautious overall interpretation of results considering objectives, limitations, multiplicity of analyses, results from similar studies, and other relevant evidence | 12-14 |



|                          |    |                                                                                                                                                               |     |
|--------------------------|----|---------------------------------------------------------------------------------------------------------------------------------------------------------------|-----|
| Generalisability         | 21 | Discuss the generalisability (external validity) of the study results                                                                                         | 14  |
| <b>Other information</b> |    |                                                                                                                                                               |     |
| Funding                  | 22 | Give the source of funding and the role of the funders for the present study and, if applicable, for the original study on which the present article is based | 222 |

\*Give information separately for cases and controls in case-control studies and, if applicable, for exposed and unexposed groups in cohort and cross-sectional studies.

**Note:** An Explanation and Elaboration article discusses each checklist item and gives methodological background and published examples of transparent reporting. The STROBE checklist is best used in conjunction with this article (freely available on the Web sites of PLoS Medicine at <http://www.plosmedicine.org/>, Annals of Internal Medicine at <http://www.annals.org/>, and Epidemiology at <http://www.epidem.com/>). Information on the STROBE Initiative is available at [www.strobe-statement.org](http://www.strobe-statement.org).
